# Supplementary material for: Single-Cell RNA Sequencing Reveals Endothelial Cell Transcriptome Heterogeneity Under Homeostatic Laminar Flow
Source: PubMed Central journal article supplement — Arterioscler Thromb Vasc Biol. 2021 Aug 26;41(10):2575–84. doi: 10.1161/ATVBAHA.121.316797 (PMC8454496; doi:10.1161/atvbaha.121.316797), 2021-08-26
Supplement: atv-41-2575-s001.pdf [file atv-41-2575-s001.pdf]

## SUPPLEMENTAL MATERIALS

### **Single-Cell RNA Sequencing Reveals Endothelial Cell Transcriptome Heterogeneity under Homeostatic Laminar Flow**

Ziqing Liu (刘子青)<sup>1,2</sup>, Dana L Ruter<sup>1,2,3,^</sup>, Kaitlyn Quigley<sup>4</sup>, Natalie T Tanke<sup>5</sup>, Yuchao Jiang<sup>3,6,7</sup>, Victoria L Bautch<sup>1,2,3,5,8,#</sup>

<sup>1</sup>Integrative Program for Biological & Genome Sciences, <sup>2</sup>McAllister Heart Institute, <sup>3</sup>Lineberger Comprehensive Cancer Center, <sup>4</sup>Department of Chemistry, <sup>5</sup>Curriculum in Cell Biology and Physiology, <sup>6</sup>Department of Biostatistics, <sup>7</sup>Department of Genetics, <sup>8</sup>Department of Biology, University of North Carolina, Chapel Hill.

Running title: EC gene expression variance under flow

#Corresponding Author: Victoria L. Bautch, PhD, Department of Biology, CB No. 3280, The University of North Carolina at Chapel Hill, Chapel Hill, NC USA 27599. E-mail [bautch@med.unc.edu](mailto:bautch@med.unc.edu)

^Current address: KBI Biopharma Inc., RTP, NC USA 27703

## Major Resources Table

### Antibodies

| Target antigen                   | Vendor or Source | Catalog #   | Working concentration | Lot # | Persistent ID / URL |
|----------------------------------|------------------|-------------|-----------------------|-------|---------------------|
| rabbit anti-HMGN2                | Cell Signaling   | 9437S       | 1:500 (2 µg/ml)       |       |                     |
| Alexa647-mouse-anti-human PECAM1 | Biologend        | 303112      | 1:250 (2 µg/ml)       |       |                     |
| rabbit anti-ANKRD1               | Invitrogen       | PA5-30548   | 1:100 (10 µg/ml)      |       |                     |
| mouse anti-NPM1                  | Invitrogen       | 32-5200     | 1:250 (2 µg/ml)       |       |                     |
| rabbit anti-DEK                  | Abcam            | ab221545    | 1:500 (0.9 µg/ml)     |       |                     |
| rabbit anti-HMGA1                | Invitrogen       | PA5-78007   | 1:500 (2 µg/ml)       |       |                     |
| rabbit anti-ERG                  | Abcam            | ab92513     | 1:100 (10 µg/ml)      |       |                     |
| rabbit anti-LMNA                 | Abcam            | ab26300     | 1:1000 (1 µg/ml)      |       |                     |
| rabbit anti-KLF2                 | Invitrogen       | PA5-72410   | 1:200 (5 µg/ml)       |       |                     |
| rabbit anti-SUN1                 | Abcam            | ab124770    | 1:500 (2 µg/ml)       |       |                     |
| mouse anti-SUN2 (clone 3.1E)     | Millipore-Sigma  | MABT880     | 1:1000 (1 µg/ml)      |       |                     |
| donkey-anti-mouse-Alexa555       | Abcam            | ab150110    | 1:250 (8 µg/ml)       |       |                     |
| donkey-anti-rabbit-Alexa488      | Invitrogen       | A21206      | 1:250 (8 µg/ml)       |       |                     |
| DAPI                             | Sigma            | 10236276001 | 0.04 µg/ml            |       |                     |

### Cultured Cells

| Name                                           | Vendor or Source             | Sex (F, M, or unknown) | Persistent ID |
|------------------------------------------------|------------------------------|------------------------|---------------|
| Human umbilical vein endothelial cells (HUVEC) | Lonza                        | unknown                | C2519A        |
| Mouse embryonic fibroblasts (MEF)              | Isolated from E13.5 CD1 mice | unknown                |               |

### Data & Code Availability

| Description                                                      | Source / Repository | Persistent ID |
|------------------------------------------------------------------|---------------------|---------------|
| Raw (.fastq) and processed (UMI counts) single-cell RNA-seq data | GEO database        | GSE151867     |

### Other

| Description                                                  | Source / Repository | Persistent ID |
|--------------------------------------------------------------|---------------------|---------------|
| fibronectin                                                  | Roche               | 11080938001   |
| µ channel slide                                              | ibidi               | 80176         |
| Endothelial Cell Growth Medium (EGM)-2 Bullet Kit            | Lonza               | CC-3162       |
| Chromium™ Single Cell 3' Library and Gel Bead Kit v2, 4 rxns | 10x Genomics        | 120267        |
| Chromium™ Single Cell A Chip Kit, 16 rxns                    | 10x Genomics        | 1000009       |
| Chromium™ i7 Multiplex Kit, 96 rxns                          | 10x Genomics        | 120262        |

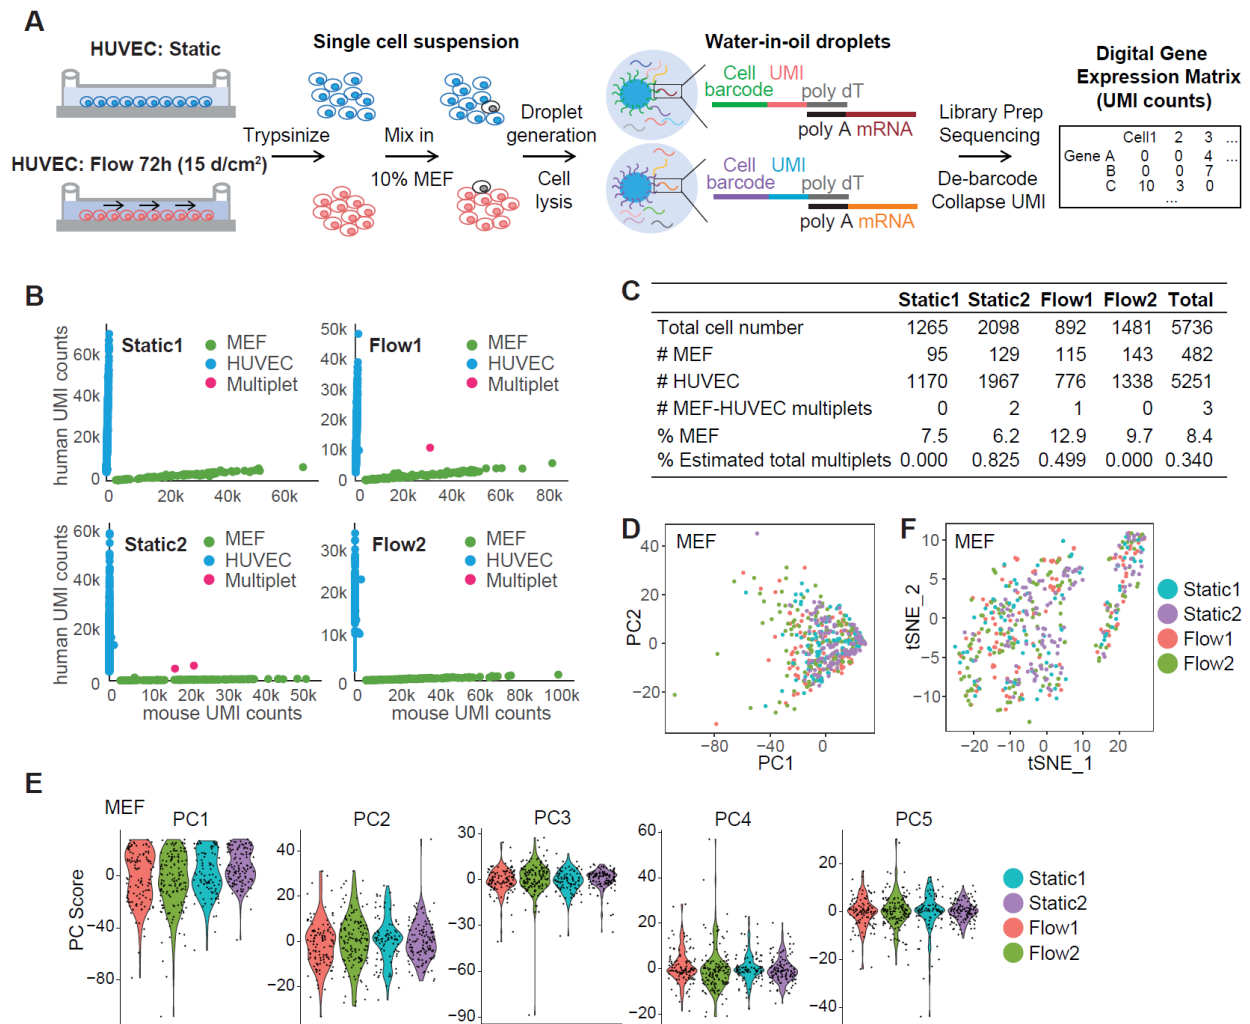

### Supplemental Figure I. Single-cell RNA-seq experiment workflow and quality control.

(A) Experimental workflow. Beads are coated with numerous DNA oligos containing 14 bp cell barcode (one oligo sequence/bead, different sequences among different beads), a 10 bp unique molecular identifier (UMI, unique sequence for each oligo on the same bead), and a poly dT sequence to capture mRNA. (B) Multiplet discrimination of indicated samples by plotting UMI counts of each cell barcode that map to human (HUVEC, blue dots), mouse (MEF, green dots), or both (red dots) genomes. (C) Summary of cell number and multiplet rates. (D) PCA of MEF from indicated samples calculated with top 2000 highly variable genes. (E) Score for PC1-PC5 of PCA. (F) tSNE plot of MEF from indicated samples calculated with PC1-PC10.

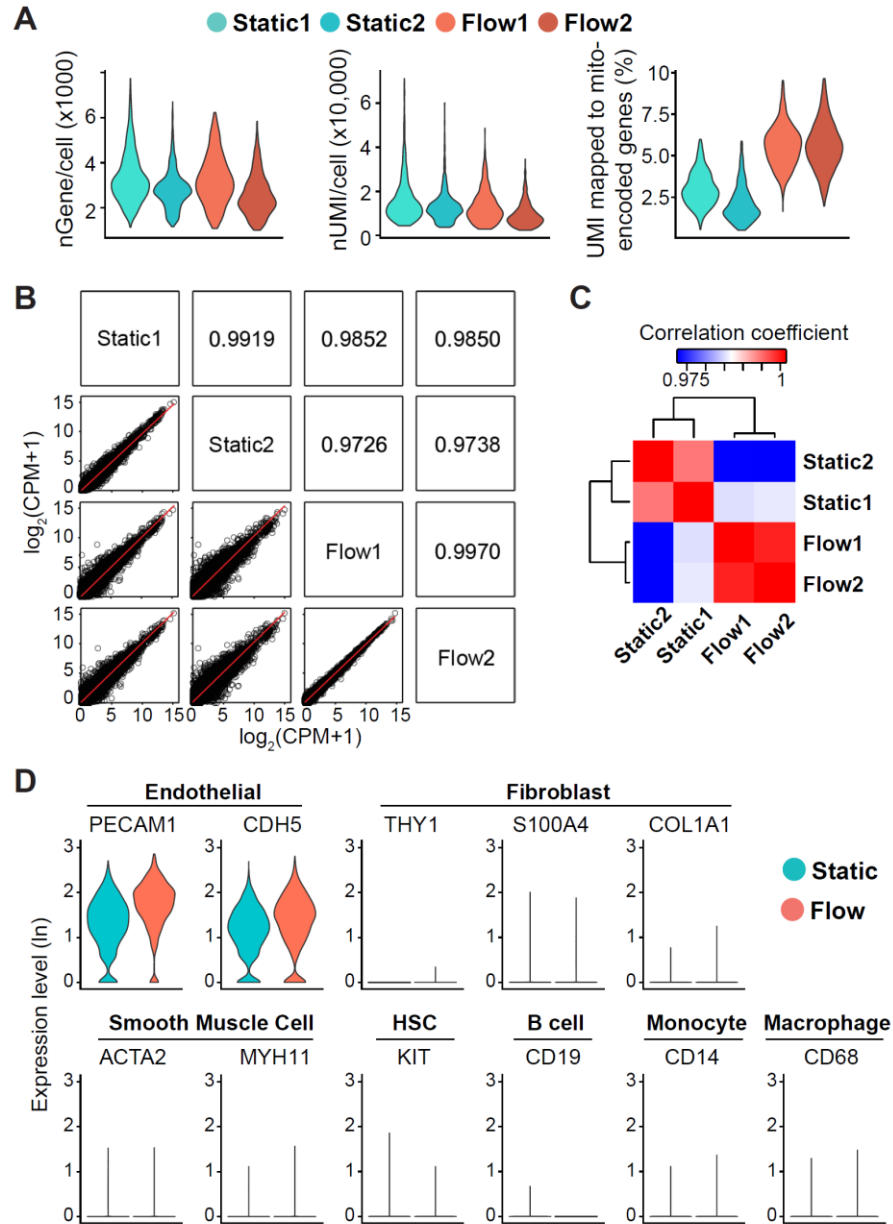

**Supplemental Figure II. HUVEC single-cell RNA-seq data quality control.**

(A) Distribution of detected genes/cell (left), UMI counts/cell (middle), and % UMI counts mapped to mitochondrial-encoded genes (right). (B-C) Pearson correlation analysis among pseudo-bulk samples assembled from the single-cell RNA-seq data showing a higher correlation between biological replicates than across conditions. (B) Dot plots with trend lines. (C) Heatmap color-coded by correlation coefficient. (D) Expression of canonical markers of EC, fibroblast, smooth muscle cells, hematopoietic stem cells, B cells, monocytes, and macrophages. Expression of several other markers were undetected in the dataset: CD45 (blood cells), CD235a (red blood cells), CD11b (macrophage), CD3 (T cells), CD15 (neutrophil).

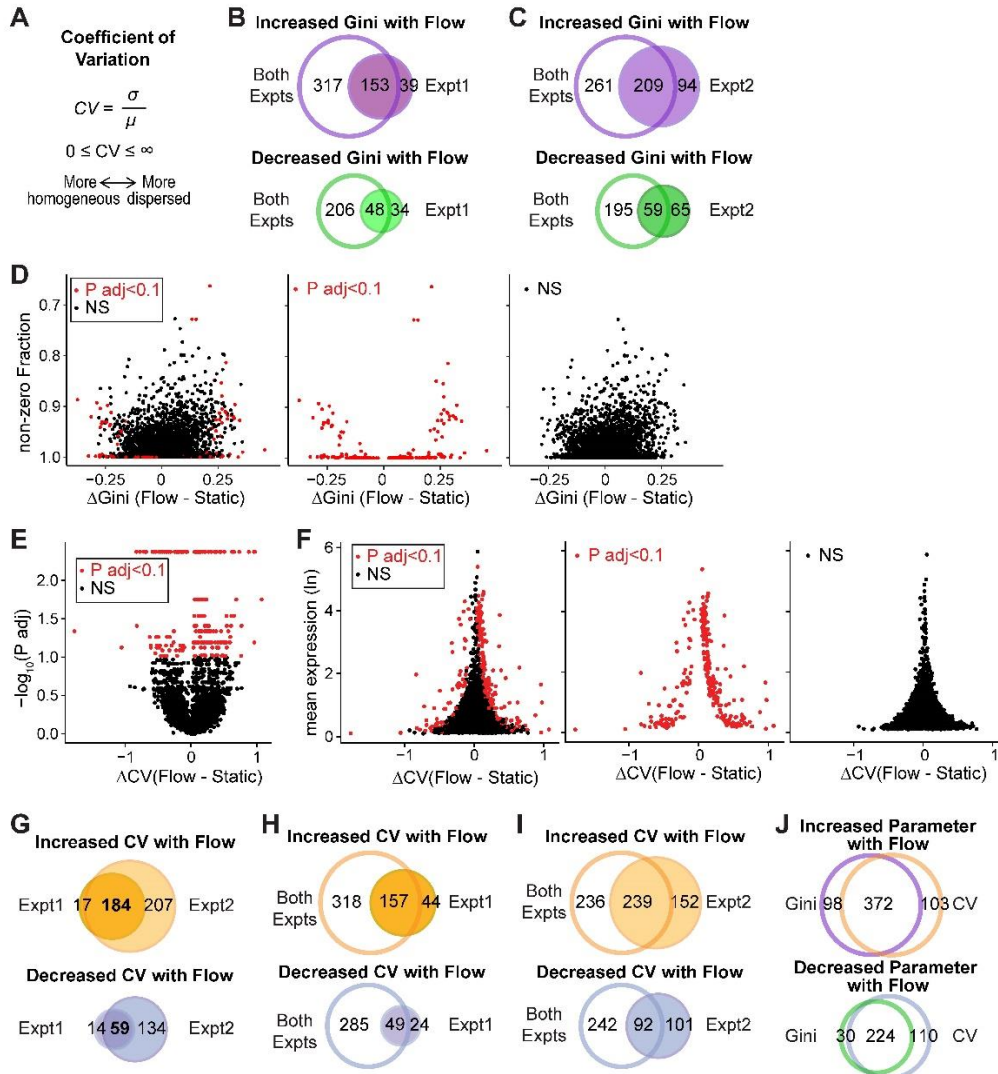

### Supplemental Figure III. Transcriptomic heterogeneity of EC under homeostatic laminar flow.

(A) CV formula. (B-C) Differential Gini test of HUVEC transcriptomes between static and flow performed with batch as a covariate. Resulting significant gene lists were compared to results of each independent experiment without batch correction (Fig. 1F-I) — experiment 1 in (B) and experiment 2 in (C). (D) Each gene's Gini change plotted against DESCEND-deconvolved non-zero fraction. (E-J) CV was calculated for each gene with DESCEND and differential test of CV was performed for each experiment. (E-F) Each gene's CV change plotted against p value (E) or mean expression (F). Red dots, significant genes ( $P \text{ adj} < 0.1$ ), black dots, non-significant genes. (G) Venn plots showing overlap of genes with significant CV change in the two replicate experiments. (H-J) Differential CV test of HUVEC between static and flow performed for each gene with batch as a covariate. Resulting significant gene lists were compared to results of each independent experiment without batch correction — experiment 1 in (H) and experiment 2 in (I). (J) Venn plots showing overlap of genes with significant Gini vs. CV changes after batch correction.

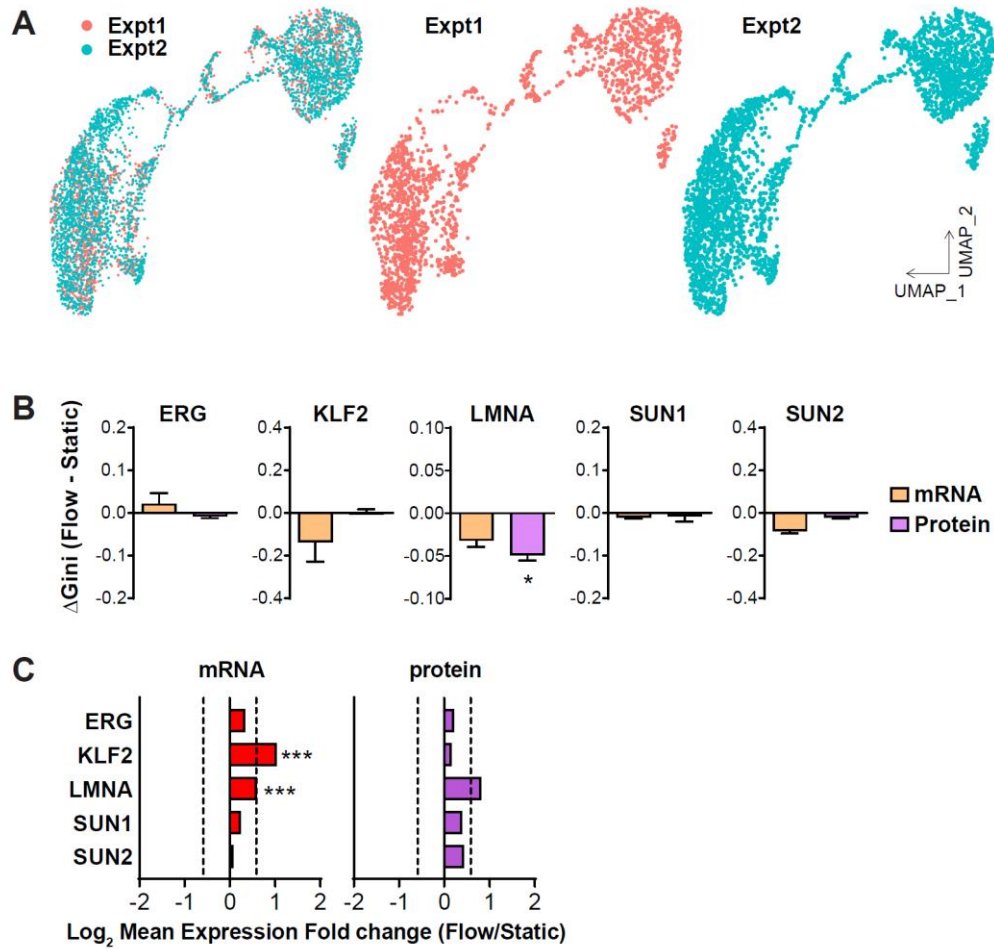

**Supplemental Figure IV. Quality control for subpopulation analysis of single-cell RNA-seq and additional protein heterogeneity of EC under homeostatic laminar flow.**

(A) UMAP plots of single-cell HUVEC transcriptome colored by experimental duplicates. (B-C) HUVEC immunostained for nuclear genes under flow vs. static. (B) Gini change under flow vs. static for tested nuclear genes at the RNA (single-cell RNA-seq, all non-significant by DESCEND) and protein level (immunostaining). Error bars, mean  $\pm$  SEM from multiple replicates. Statistics for protein, paired t test, \*  $p < 0.05$ . (C) Mean expression level fold change for tested genes at the RNA (single-cell RNA-seq) and protein level (mean fluorescence intensity from 3 independent experiments). Dotted lines, Fold change = 1.5. Statistics for mRNA, Wilcoxon rank-sum test, \*\*\*  $p < 0.001$ . Statistics for protein, ratio paired t test, all non-significant.
