# Supplementary material for: Single-Cell RNA Sequencing Reveals Endothelial Cell Transcriptome Heterogeneity Under Homeostatic Laminar Flow
Source: PubMed Central journal article supplement — Arterioscler Thromb Vasc Biol. 2021 Aug 26;41(10):2575–84. doi: 10.1161/ATVBAHA.121.316797 (PMC8454496; doi:10.1161/atvbaha.121.316797), 2021-08-26
Supplement: atv-41-2575-s002.pdf [file atv-41-2575-s002.pdf]

## Online Supplemental Material

### **Apolipoprotein M and sphingosine-1-phosphate receptor 1 promote the transendothelial transport of HDL**

*Srividya Velagapudi<sup>1,\*</sup>, Lucia Rohrer<sup>1,\*</sup>, Francesco Poti<sup>2,3,\*</sup>, Renate Feuerborn<sup>4</sup>, Damir Perisa<sup>1</sup>, Dongdong Wang<sup>1</sup>, Grigorios Panteloglou<sup>1</sup>, Anton Potapenko<sup>1</sup>, Mustafa Yalcinkaya<sup>1</sup>, Andreas J. Hülsmeier<sup>1</sup>, Bettina Hesse<sup>5</sup>, Alexander Lukasz<sup>5</sup>, Mingxia Liu<sup>6</sup>, John S. Parks<sup>6</sup>, Christina Christoffersen<sup>7</sup>, Markus Stoffel<sup>8</sup>, Manuela Simoni<sup>3</sup>, Jerzy-Roch Nofer<sup>3,4,9,\*</sup>, and Arnold von Eckardstein<sup>1,\*</sup>,§*

1. Institute of Clinical Chemistry, University of Zurich and University Hospital of Zurich, Switzerland
2. Department of Medicine and Surgery - Unit of Neurosciences, University of Parma, Parma, Italy
3. Department of Biomedical, Metabolic and Neural Sciences - Unit of Endocrinology, University of Modena and Reggio Emilia, Modena, Italy
4. Central Laboratory Facility, University Hospital of Münster, Germany
5. Department of Medicine D, Division of General Internal Medicine, Nephrology, and Rheumatology, University Hospital Münster, Münster, Germany
6. Department of Internal Medicine/Section of Molecular Medicine, Wake Forest School of Medicine, Winston-Salem, NC 27157, USA.
7. Department of Biomedical Science, University of Copenhagen, and Department of Clinical Biochemistry, Rigshospitalet, Copenhagen, Denmark
8. Institute of Molecular Health Sciences, ETH Zurich, Otto-Stern-Weg 7, 8093 Zürich, Switzerland.
9. Institute of Clinical Chemistry and Laboratory Medicine, University Medical Center Hamburg-Eppendorf, Hamburg, Germany

\*: The three first authors and two last authors made equal contributions

§: Corresponding author: Arnold von Eckardstein, MD, Institute of Clinical Chemistry, University Hospital of Zurich, Switzerland, Raemistrasse 100, CH-8091 Zurich, Switzerland

- **Major Resource Table**
- **2 Supplemental Tables I and II**
- **5 supplemental figures I through V**

## Major Resources Table

### Animals (in vivo studies)

| Species                                      | Vendor or Source                                    | Background Strain | Sex | Persistent ID / URL                                                               |
|----------------------------------------------|-----------------------------------------------------|-------------------|-----|-----------------------------------------------------------------------------------|
| Mouse<br>( <i>Mus Musculus</i> )<br>C57Bl/6J | Charles River Laboratories,<br>Sulzfeld,<br>Germany | C57Bl/6J          | F   | <a href="https://www.jax.org/strain/000664">https://www.jax.org/strain/000664</a> |

### Genetically Modified Animals

|                        | Species                                                                                                                                                                       | Vendor or Source                                                           | Back-ground Strain | Other Information                                                    | Persistent ID / URL                                                                                                                                                                                        |
|------------------------|-------------------------------------------------------------------------------------------------------------------------------------------------------------------------------|----------------------------------------------------------------------------|--------------------|----------------------------------------------------------------------|------------------------------------------------------------------------------------------------------------------------------------------------------------------------------------------------------------|
| <b>Parent - Male</b>   | Mouse ( <i>Mus Musculus</i> )<br>Tg(Cdh5-cre/ERT2)CIVE23Mlia<br>X<br>B6.129P2-Apoetm1Unc/J<br>(referred to as <i>Apoe</i> <sup>-/-</sup><br><i>Cdh5-CreER</i> <sup>T2</sup> ) | Christian Weber<br>(Ludwig Maximillian University,<br>München,<br>Germany) | C57Bl/6J           |                                                                      | <a href="http://www.informatics.jax.org/allele/MGI:3700149">http://www.informatics.jax.org/allele/MGI:3700149</a><br><br><a href="https://www.jax.org/strain/002052">https://www.jax.org/strain/002052</a> |
| <b>Parent - Female</b> | Mouse ( <i>Mus Musculus</i> )<br><br><i>C57Bl/6J-Gt(ROSA)26Sor<sup>tm1(S1pr1)Geo</sup><sub>no</sub></i><br>(referred to as <i>S1pr1<sup>LSL</sup></i> line)                   | Genoway,<br>Lyon,<br>France                                                | C57Bl/6J           | Generated on behalf of University of Modena and Reggio Emilia, Italy | Not available                                                                                                                                                                                              |

### Cultured Cells

| Name                                     | Vendor or Source                          | Sex             | Catalogue #    |
|------------------------------------------|-------------------------------------------|-----------------|----------------|
| Bovine aortic endothelial cells (BAECs). | Veal calf aorta,<br>Slaughterhouse Zurich | Unknown         | Not applicable |
| Human aortic endothelial cells (HAECs)   | Cell Applications Inc                     | Male and female | 304-05a        |

## Antibodies

| Target antigen                                         | Vendor or Source | Catalog #                | Working concentration (µg/mL) |
|--------------------------------------------------------|------------------|--------------------------|-------------------------------|
| S1P <sub>1</sub> , Western blot                        | Abcam            | ab125074                 | 0.3                           |
| S1P <sub>1</sub> , immunofluorescence                  | MyBiosource      | MBS8534430               | 20                            |
| SR-BI, Western blot                                    | Novus            | NB400-131                | 3.0                           |
| SR-BI, immunofluorescence                              | Novus            | NB400-101                | 20                            |
| LDL-receptor, Western blot                             | Abcam            | ab52818                  | 0.7                           |
| Na <sup>+</sup> /K <sup>+</sup> - ATPase, Western blot | Santa Cruz       | SC-21712                 | 1.0                           |
| TATA binding protein, Western blot                     | Abcam            | ab51841                  | 1.0                           |
| VE-cadherin, Immunofluorescence                        | Novus            | NBP1-43347               | 10                            |
| Goat Anti-Rabbit Immunoglobulins /HRP                  | Agilent Dako     | P0448                    | 0.1                           |
| Rabbit Anti-Goat Immunoglobulins/ HRP                  | Agilent Dako     | P0449                    | 0.2                           |
| Rabbit Anti-Mouse Immunoglobulins/ HRP                 | Agilent Dako     | P0260                    | 0.5                           |
| Secondary antibodies Immunofluorescence                | Santa Cruz       | sc-516250<br>sc-516248   | 1,3                           |
| Secondary antibodies Immunofluorescence                | Novus            | NBP1-76096<br>NBP1-72973 | 3.3                           |

## Small Interfering RNAs

| Gene                        | Vendor or Source       | Catalogue #              | Final concentration |
|-----------------------------|------------------------|--------------------------|---------------------|
| <i>S1P<sub>1</sub></i>      | Ambion silencer select | s4449,<br>s4447<br>s4448 | 5nmol/L             |
| <i>SCARB1</i>               | Ambion silencer select | s2648<br>s2649<br>s2650  | 5nmol/L             |
| Non-silencing control siRNA | Ambion silencer select | 4390843                  | 5nmol/L             |

**Primer sequences**

| <b>Primer name</b>                                   | <b>Sequence</b>                            |
|------------------------------------------------------|--------------------------------------------|
| <i>S1pr1</i> <sup>LSL</sup> excised allele - forward | AAC ATA CTC CCT TCC CGC AGA AACC           |
| <i>S1pr1</i> <sup>LSL</sup> excised allele - reverse | AGC CTC TGC TAA CCA TGT TCA TGCC           |
| <i>mS1pr1</i> – forward                              | GCA ACT TAA TTT TAT TAG GAC AAG GCT GGT GG |
| <i>mS1pr1</i> - reverse                              | TCT TCA TCC TAC TAC TGT TAG ATG TGG GCT GC |
| WT <i>Rosa26</i> Locus - forward                     | CAA TAC CTT TCT GGG AGT TCT CTGC           |
| WT <i>Rosa26</i> Locus - reverse                     | CTG CAT AAA ACC CCA GAT GAC TACC           |
| VeCAD_Cre - forward                                  | ATC CGA AAA GAA AAC GTT GA                 |
| VeCAD_Cre - reverse                                  | ATC CAG GTT ACG GAT ATA GT                 |
| hS1PR1 - forward                                     | GTC TGG AGT AGCGCC ACC                     |
| hS1PR1 - reverse                                     | GTA GTC AGA GAC CGA GCT GC                 |
| hSCARB1 - forward                                    | CTG TGG GTG AGA TCA TGT GG                 |
| hSCARB1 – reverse                                    | GCC AGA AGT CAA CCT TGC TC                 |
| hGAPDH – forward                                     | CCC ATG TTC GTC ATG GGT GT                 |
| hGAPDH - reverse                                     | TGG TCA TGA GTC CTT CCA CGA TA             |

**Supplemental table I: Treatment with S1P1 agonist SEW2871 differentially regulates endothelial permeability for HDL and Evan's Blue in wild type mice**

|                                            | vehicle                | SEW 2871                 | P*    |
|--------------------------------------------|------------------------|--------------------------|-------|
| Evans' Blue in the peritoneal fluid (arbU) | 0.32 ± 0.02<br>(N = 5) | 0.26 ± 0.01 *<br>(N = 5) | 0.041 |
| DyL-HDL in the peritoneal fluid (arbU)     | 78.2 ± 5.2<br>(N = 8)  | 106.8 ± 13.2*<br>(N = 8) | 0.032 |

i.v. injection of Evan's Blue (600 µg/animal) or DyLight-HDL (350µg/animal) and i. p. stimulation with lipopolysaccharide (25.0 µg/animal). SEW2871 administration (15µg/g body weight) 150 min prior to stimulation with LPS. Collection of peritoneal fluid 3h after stimulation with LPS. (Results are presented as means ± SEM; \*: P calculated by Mann-Whitney U-Test. (arbU = arbitrary units)

**Supplemental Table II: Less severe hypercholesterolemia and fatty streak formation in S1P1-iECKI mice fed with a high fat diet**

|                                                                | CTRL<br>(N = 5) | S1P <sub>1</sub> -iECKI<br>(N = 5) | P*      |
|----------------------------------------------------------------|-----------------|------------------------------------|---------|
| Total cholesterol (mmol/L)                                     | 6.56 ± 0.25     | 4.66 ± 0.27                        | < 0.001 |
| HDL-cholesterol (mmol/L)                                       | 2.21 ± 0.16     | 1.57 ± 0.10                        | 0.0086  |
| nonHDL cholesterol (mmol/L)                                    | 4.34 ± 0.17     | 3.10 ± 0.35                        | 0.0127  |
| Triglycerides (mmol/L)                                         | 0.41 ± 0.02     | 0.41 ± 0.04                        | 0.970   |
| Oil red stained area in the aortic roots (% plaque/total area) | 1.38 ± 0.24     | 0.35 ± 0.11                        | 0.0087  |

*ApoE* haploinsufficient mice with (S1P<sub>1</sub>-iECKI) or without (CTRL) a knock-in of *S1p1* were fed for 30 weeks with a western diet containing 1.25% cholesterol before they were sacrificed for collection of blood and aortas. (Results are presented as means ± SEM; \*: P calculated by Mann-Whitney U-Test).

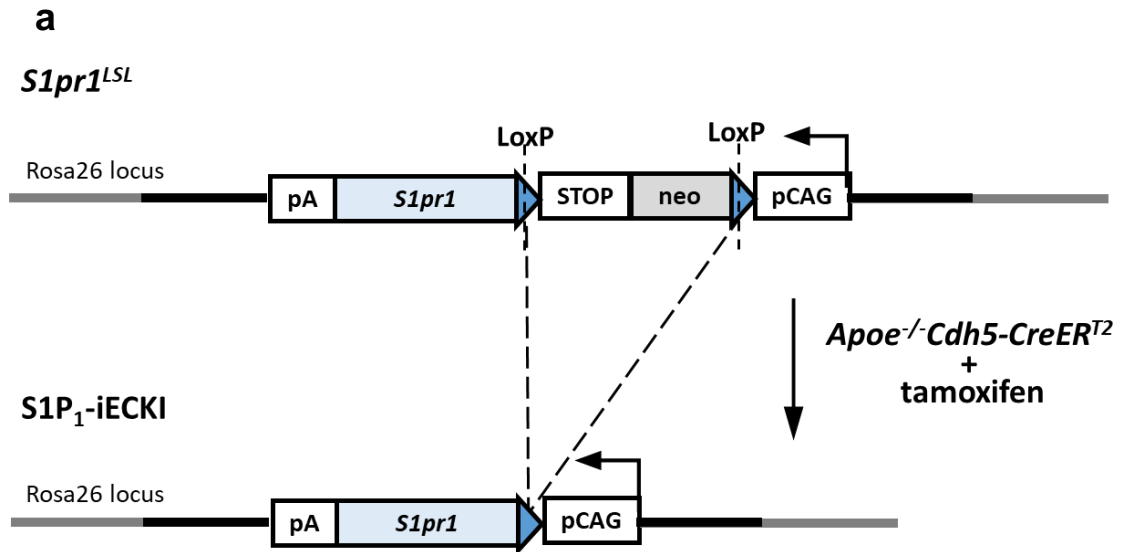

**b**

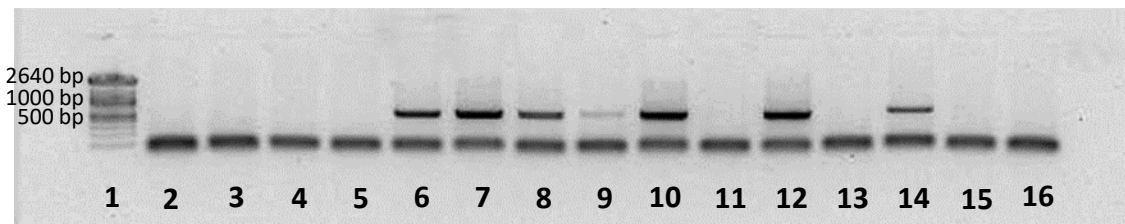

**Supplementary Figure I: Targeting vector/transgene structure and Cre-mediated activation of transcription.** (a) The transgene, inserted within the ROSA26 locus via homologous recombination, contains the murine *S1pr1* cDNA, separated from the synthetic cytomegalovirus early enhancer/chicken  $\beta$ -actin (CAG) strong promoter by a LoxP-STOP-Neomycin-LoxP (LSL) cassette. *S1pr1<sup>LSL</sup>* mice were crossed with the tamoxifen inducible *Apoe<sup>-/-</sup> Cdh5-CreER<sup>T2</sup>* mice, which express the Cre recombinase under control of the VE-cadherin promoter, active in endothelial cells only. Gene overexpression was achieved by intraperitoneal injection of tamoxifen and the LSL insert is hence excised only in Cre-expressing cells. *S1P<sub>1</sub>-iECKI*: *S1P<sub>1</sub>-* inducible endothelial cell knock-in mice. (b) Agarose gel electrophoresis of PCR-amplified genomic DNA from lungs of wild type mice and *S1P<sub>1</sub>-ECKI* mice. From the left: lane 1 molecular weight marker (Marker XIV, Roche); lanes 2 through 15, fourteen samples of mouse genomic DNA; lane 16 water (last lane). Upper bands ( $\approx$ 600bp) in samples depicted in lanes 6, 7, 8, 9, 10, 12, and 14 identify samples of *S1P<sub>1</sub> ECKI* mice with the excision event. The lower band is generated by the primers.

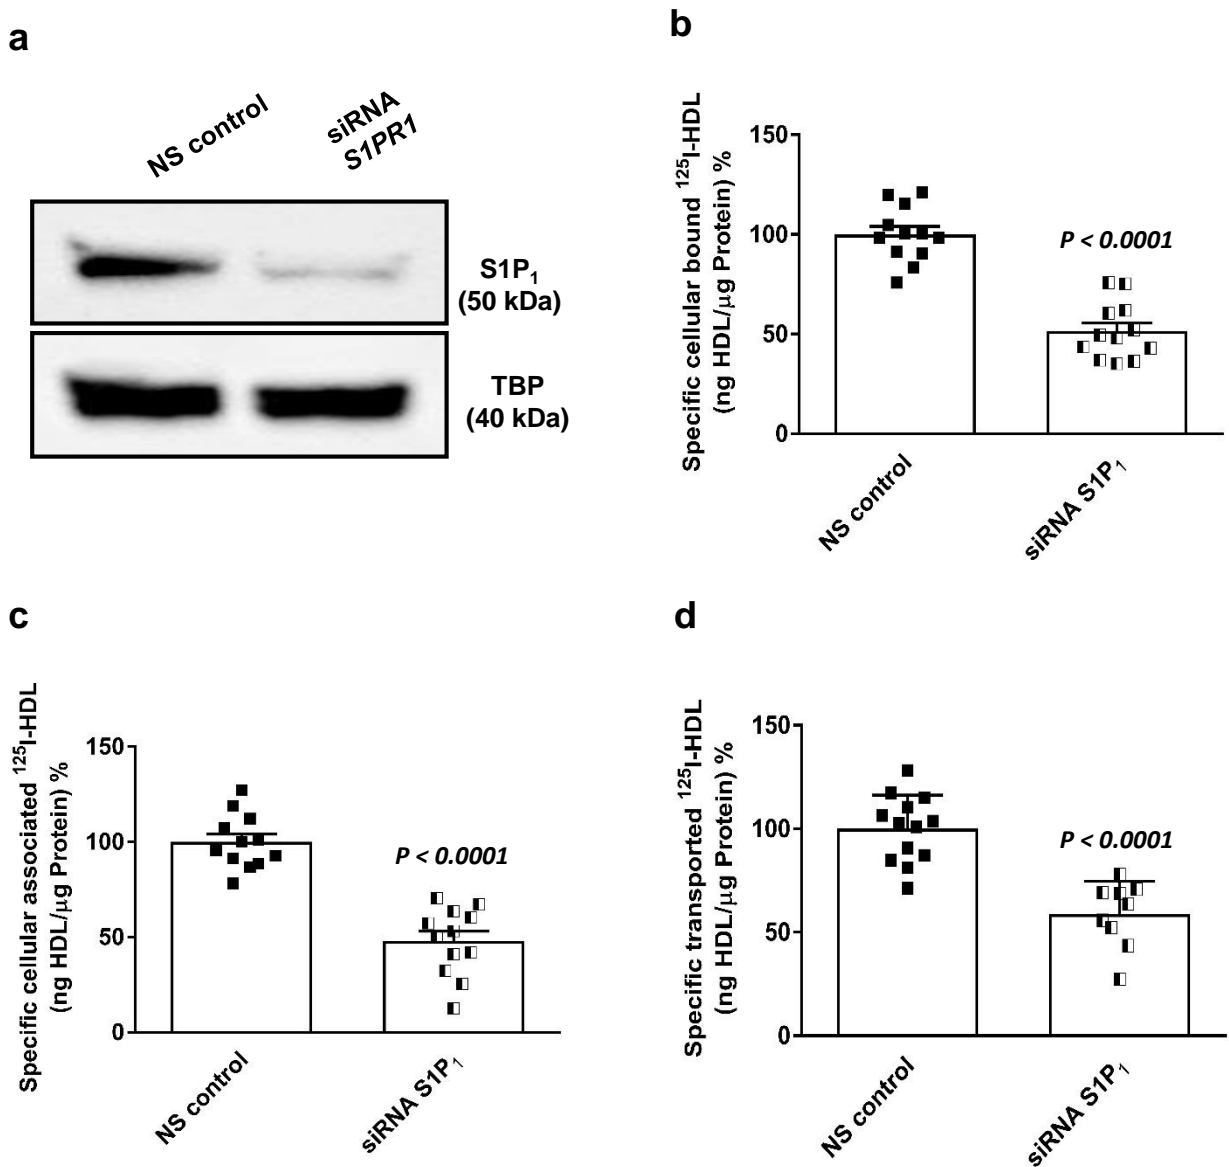

**Supplementary Figure II: RNA interference with S1P<sub>1</sub> inhibits binding, association, and transport of HDL by human aortic endothelial cells (HAECs).** HAECs were transfected with a specific siRNA against S1P<sub>1</sub> with non-silencing control siRNA (NS control) and functional assays were performed 72 hours post-transfection. **(a)** representative Western blot showing the efficacy of S1P<sub>1</sub> silencing relative to the non-silencing siRNA (NS control) and TATA-binding protein (TBP) used as the loading control. HAECs were incubated with 10μg/mL of <sup>125</sup>I-HDL for 1 hour in the absence (total) or in the presence of 40-fold excess of unlabeled HDL, to record nonspecific interactions. Specific binding, association and transport were calculated by subtracting nonspecific values from total values. **(b)** cellular binding of <sup>125</sup>I-HDL at 4 °C. **(c)** cellular association of <sup>125</sup>I-HDL at 37 °C. **(d)** for the measurement of transport of <sup>125</sup>I-HDL from the apical to the basolateral compartment, HAECs were cultured on inserts. Data represented as means ± SEM of three or four independent triplicate experiments (n=3). *P* was calculated by unpaired Mann Whitney U-test

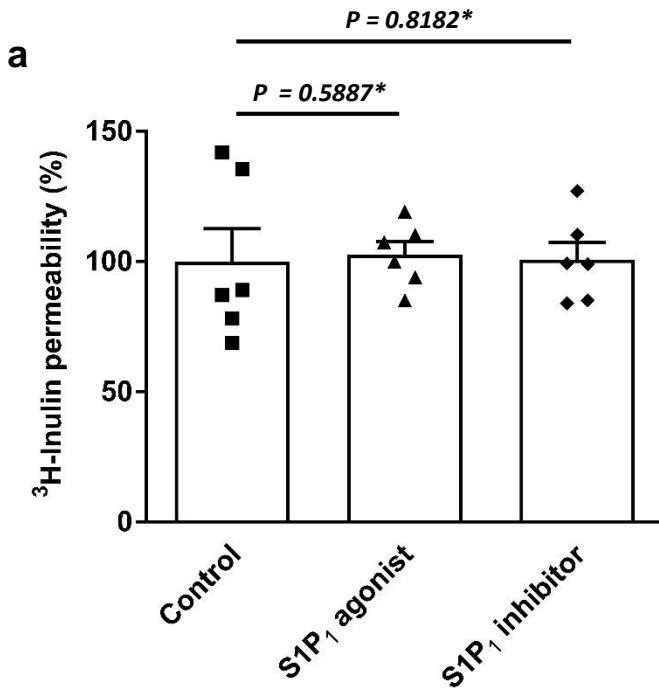

**b**

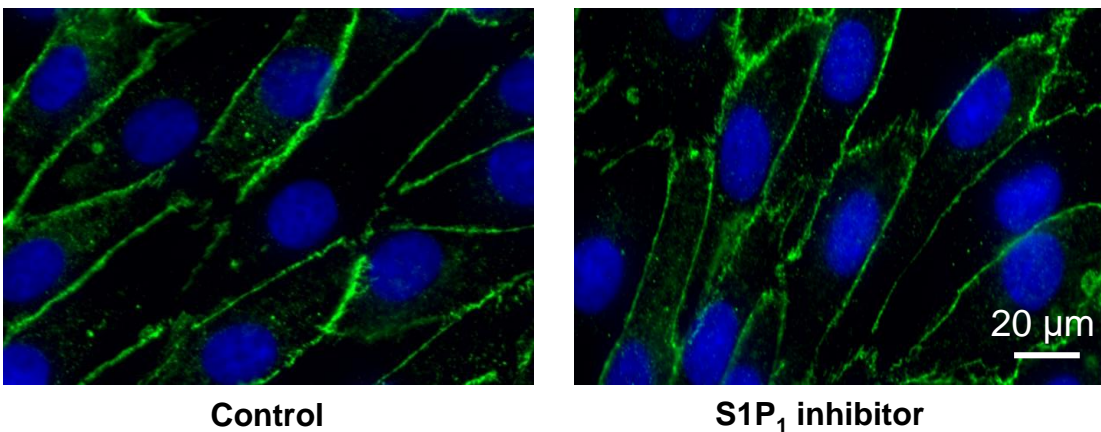

**Supplementary Figure III: Endothelial barrier function in the presence of S1P1 receptor inhibitor (a)** shows the filtration of tritiated inulin through HAECs cultivated in a transwell system: confluent cells were incubated for 30 minutes at 37 °C with 20nM of the S1P<sub>1</sub> agonist SEW2871 or 20nM of the S1P<sub>1</sub> inhibitor W146. **(b)** shows the immunostaining of endothelial tight junction protein (TJP-1) in cultivated HAECs treated with either 20nM of the S1P<sub>1</sub> inhibitor W146 or control medium .



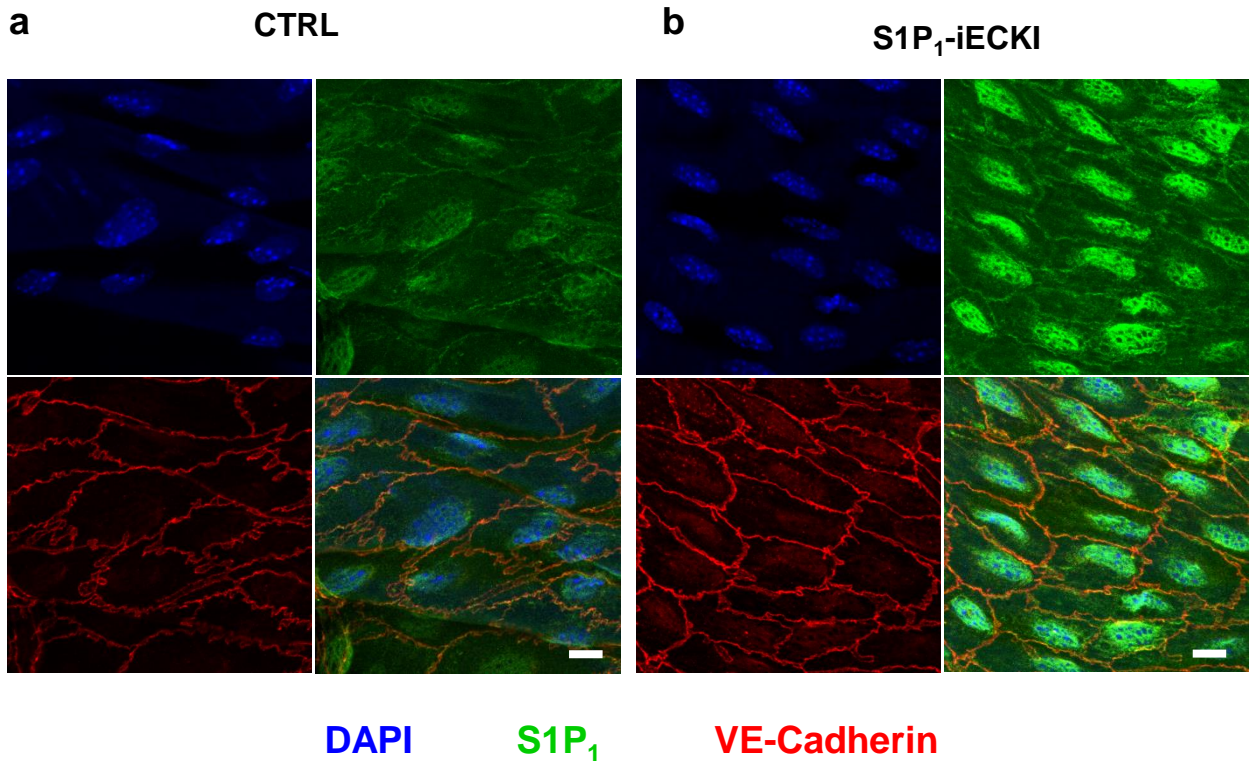

**Supplementary Figure IV: Demonstration of S1P1 in the endothelium of aortas from Apoe haploinsufficient mice without (a; CTRL) or with overexpression of S1P1 (b, S1P1-iECKI).** Figure shows en-face prepared aortic immunostainings. Aortas were quickly cleared from the adventitial tissue, opened longitudinally and incubated with primary and secondary antibodies conjugated with green or red fluorescent dyes, as indicated. Nuclei were counterstained with DAPI. Images were captured by confocal microscope and z-axis projections of 14 scanned planes are shown. Scale bar = 10 $\mu$ m.

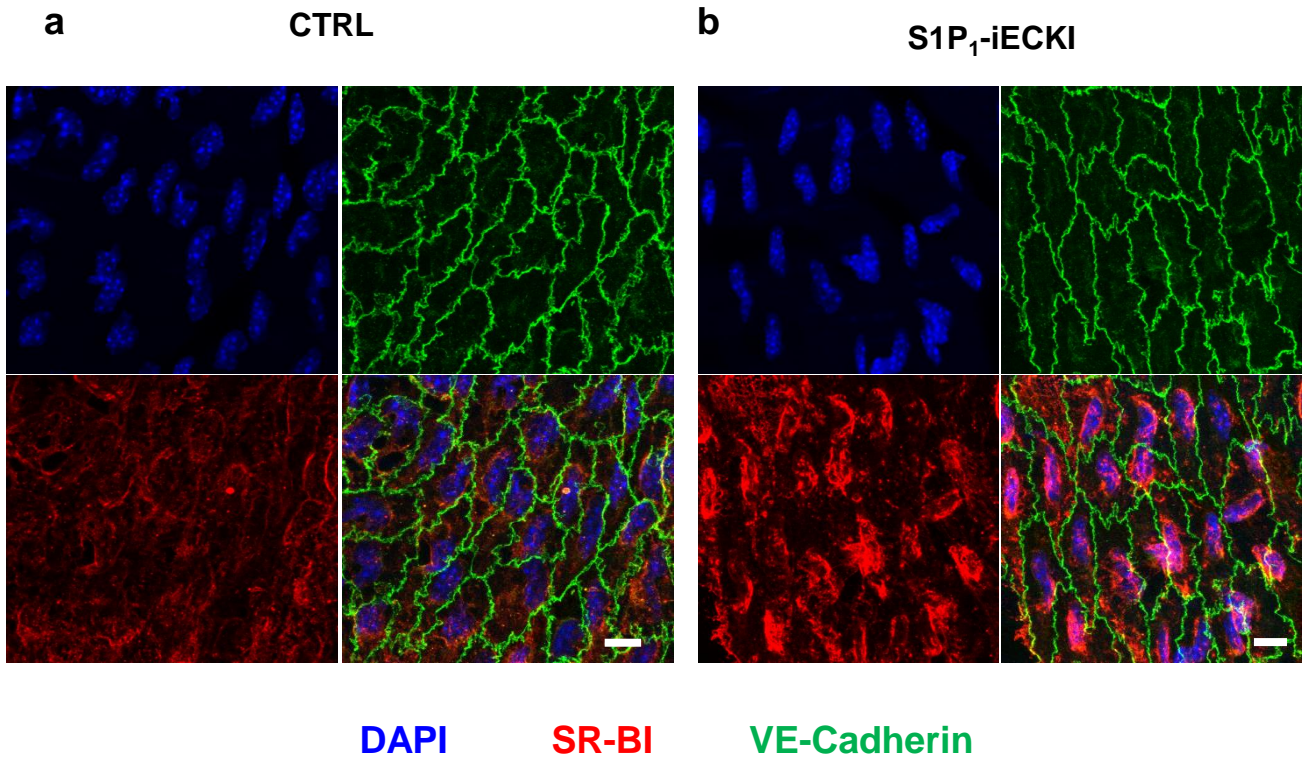

**Supplemental Figure V: Demonstration of SR-BI in the endothelium of aortas from Apoe haploinsuffS5Vicient mice without (a; CTRL) or with overexpression of S1P1 (b, S1P1-iECKI).** Figure shows en-face prepared aortic immunostainings. Aortas were quickly cleared from the adventitial tissue, opened longitudinally and incubated with primary and secondary antibodies conjugated with green or red fluorescent dyes, as indicated. Nuclei were counterstained with DAPI. Images were captured by confocal microscope and z-axis projections of 14 scanned planes are shown. Scale bar = 10µm.
